## Fibrillin-1, induced by Aurora-A but inhibited by BRCA2, promotes ovarian cancer metastasis

Ziliang Wang<sup>1,3,\*</sup>, Yang Liu<sup>2,3,\*</sup>, Lili Lu<sup>4</sup>, Lina Yang<sup>1,3</sup>, Sheng Yin<sup>2,3</sup>, Yan Wang<sup>1,3</sup>, Zihao Qi<sup>1,3</sup>, Jiao Meng<sup>1,3</sup>, Rongyu Zang<sup>2,3</sup> and Gong Yang<sup>1,3,5</sup>

<sup>1</sup>Cancer Institute, Fudan University Shanghai Cancer Center, Shanghai 200032, China

<sup>2</sup>Department of Gynecological Oncology, Fudan University Shanghai Cancer Center, Shanghai 200032, China

<sup>3</sup>Department of Oncology, Shanghai Medical College, Fudan University, Shanghai 200032, China

<sup>4</sup>Department of Biology, Life and Environment Science College, Shanghai Normal University, Shanghai 200023, China

<sup>5</sup>Central Laboratory, the Fifth People's Hospital of Shanghai Fudan University, Shanghai 200240, China

\*These authors have contributed equally to this work

### Published:

**Copyright:** © 2021 Wang et al. This is an open access article distributed under the terms of the [Creative Commons Attribution License](https://creativecommons.org/licenses/by/3.0/) (CC BY 3.0), which permits unrestricted use, distribution, and reproduction in any medium, provided the original author and source are credited.

**This article has been corrected:** Due to incorrect data transfer from different researchers and figure editing, a few accidental image duplications took place: In Figure 2A (cell invasion), duplicate images were shown for the OVCA420/Aur A cDNA and OVCA420/BRCA2 shRNA cells. In Figure 3E (cell migration and invasion), duplicate images were shown between OVCA429/FBN1 siRNA (migration) and OVCA420/Aur A cDNA/siRNA Control (invasion) cells, and image duplication also occurred between OVCA420/Aur A cDNA/FBN1 siRNA (migration) cells and OVCA420/BRCA2 shRNA/FBN1 siRNA (migration) cells. In Figure 4B, the protein bands of  $\beta$ -actin were duplicated between OVCA429 (siRNA control and Slug siRNA) and OVCA420/Aur A cDNA (siRNA control and Slug siRNA) cells. The corrected figures 2, 3 and 4, obtained using the original data, are shown below. The authors declare that these corrections do not change the results or conclusions of this paper.

Original article: Oncotarget. 2015; 6:6670–6683. <https://doi.org/10.18632/oncotarget.3118>

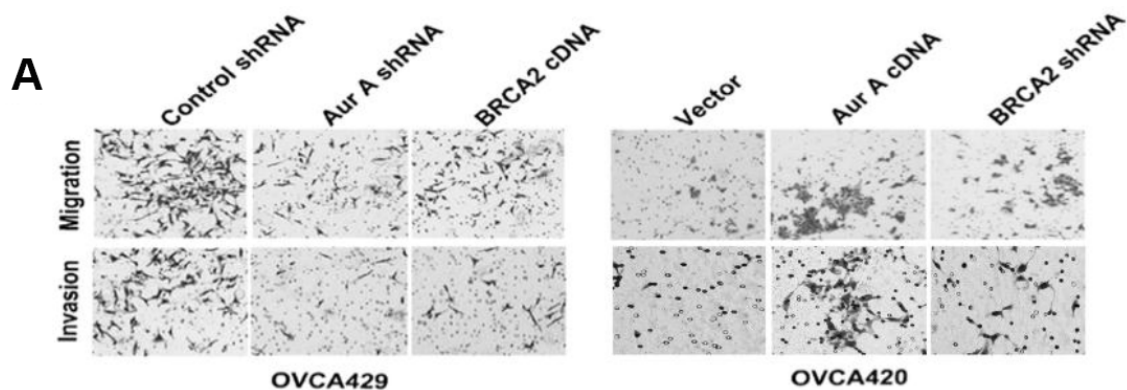

**Figure 2: Regulation of cell invasion and migration by Aur A or BRCA2.** (A) Detection of cell migration and invasion by using a high throughput screening multi-well insert 24-well two-chamber plates. (B) Quantitative analysis of invaded cells ( $P < 0.05$ ). Error bars = 95% CIs. (C) Detection of migration by scratching assay. (D) Quantitative analysis of migration speed using migration index ( $P < 0.05$ ). Error bars = 95% CIs.

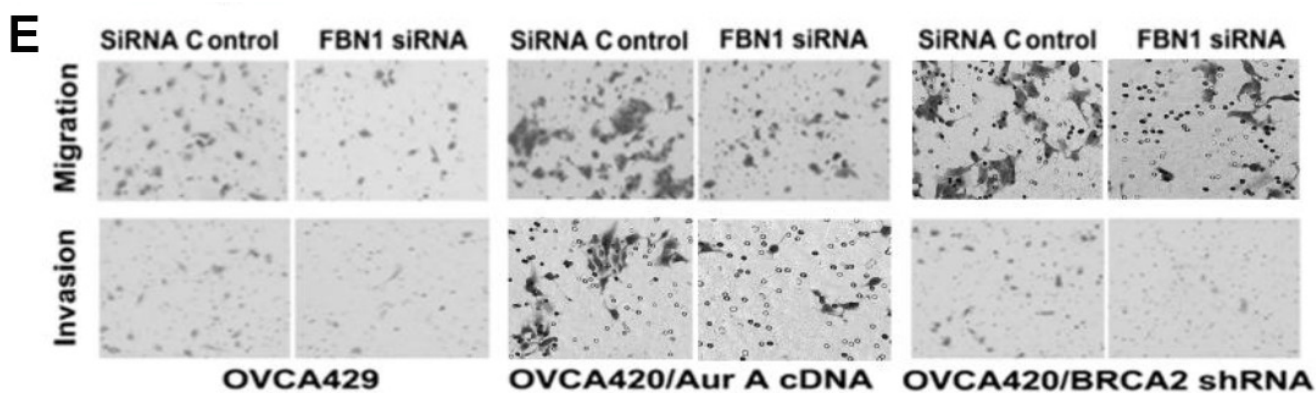

**Figure 3: Regulation of cell invasion and migration by FBN1.** (A) Detection of FBN1 and SLUG in OVCA429, OVCA429/Aur A shRNA, OVCA429/BRCA2 cDNA, OVCA420, OVCA420/Aur A cDNA, and OVCA420/BRCA2 shRNA cells. (B) Detection of the silencing efficiency of FBN1 in OVCA429 cells with three siRNAs by Western blotting. (C) Interruption of FBN1 expression in OVCA429, OVCA420/Aur A and OVCA420/BRCA2 shRNA cells with shRNA altered the expressions of multiple proteins regulated by Aur A and BRCA2.  $\beta$ -actin was used as a loading control. (D) Detection of cell migration and invasion by using a high throughput screening multi-well insert 24-well two-chamber plates. (E) Detection of migration speed of FBN1-silencing cells by scratch assay. (F) Quantitative analysis of migrated and invaded cells ( $P < 0.05$ ). Error bars = 95% CIs.

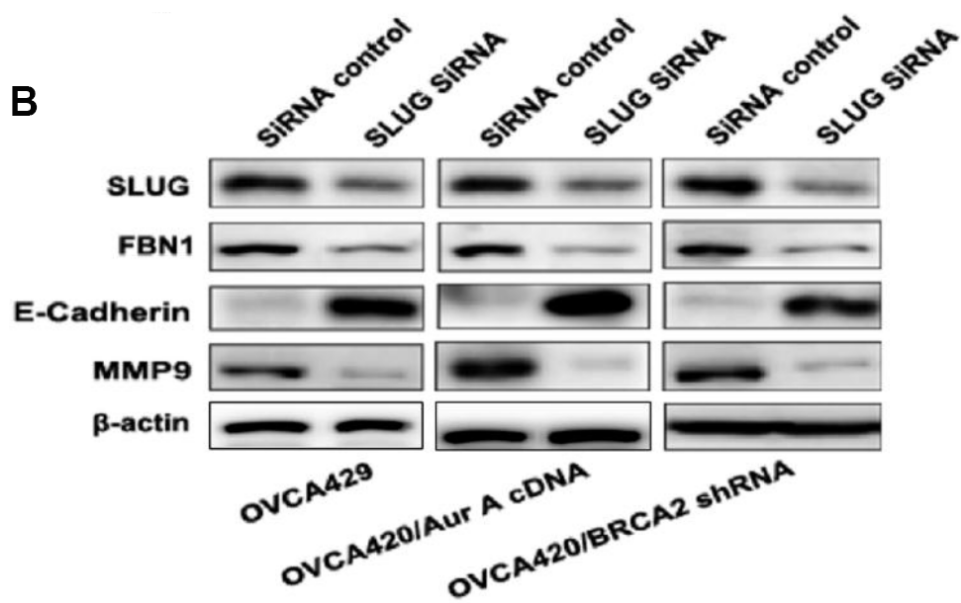

**Figure 4: Upregulation of FBN1 by SLUG and effects of FBN1 on tumorigenesis.** (A) Knockdown of SLUG with three siRNA detected by Western blotting in OVCA429. (B) Knockdown of SLUG with SiRNA detected by Western blotting in OVCA429, OVCA420/Aur A cDNA and OVCA420/BRCA2 shRNA cells and immunoblotting analysis of metastasis-associated proteins. (C) Detection of p53, SLUG and FBN1 in SKOV3 cells induced by p53 cDNA. (D–F) In vivo tumorigenesis examined by animal assays. (G) Dissection of xenograft tumors. (H) Quantitative analyses of the numbers of the nodules formed in animals ( $P < 0.025$  or  $P < 0.05$ ). Error bars = 95% CIs. (I) Quantitative analyses of the weights of the nodules dissected from mice ( $P < 0.025$  or  $P < 0.05$ ). Error bars = 95% CIs.  $\beta$ -actin was used as the loading control.
